# Supplementary material
Source: publisher site journal article supplement (https://www.spandidos-publications.com/5682/downloadSupplementary)
Supplement: Supplementary file 1 [file downloadSupplementary]

## Sheet: default
Table SII. The lncRNAs invovled in the PI3K-AKT and Calcium signaling pathways.
pathID	pathDescription	geneRatio	bgRatio	pvalue	padj	qvalue	enrichScore	overlapGeneList	overlapGeneCount	overlapGeneList_SplitResultList	name	Degree	style	Gene1	biotype	Gene2	biotype_1	style_1	interaction	Type	Abs_Value
hsa04020	Calcium signaling pathway	46/448	240/8081	5.09611e-14	1.4371e-11	1.05677e-11	3.45727	P2RX1/NTRK3/ADRB2/ATP2B4/HTR4/ADRB1/ADRB3/SLC8A2/NGF/MYLK/FGFR1/FGF9/FGF2/NOS1/ADORA2A/FGF7/CHRM2/P2RX4/PDGFRA/SLC8A3/PDE1A/CACNA1C/ITPR1/GRIN2A/RYR3/PRKCB/EDNRB/CACNA1B/ADCY2/GDNF/ERBB4/CAMK4/ATP2B2/TRDN/ATP2B1/STIM1/ADCY9/SLC8A1/PRKACB/HTR7/FGFR2/CACNA1A/CAMK2A/TACR3/GNAL/PDGFD	46	CHRM2	CHRM2	25	down	CHRM2	protein_coding	MBNL1-AS1	lincRNA	down	0.922349	1	0.922349
hsa04020	Calcium signaling pathway	46/448	240/8081	5.09611e-14	1.4371e-11	1.05677e-11	3.45727	P2RX1/NTRK3/ADRB2/ATP2B4/HTR4/ADRB1/ADRB3/SLC8A2/NGF/MYLK/FGFR1/FGF9/FGF2/NOS1/ADORA2A/FGF7/CHRM2/P2RX4/PDGFRA/SLC8A3/PDE1A/CACNA1C/ITPR1/GRIN2A/RYR3/PRKCB/EDNRB/CACNA1B/ADCY2/GDNF/ERBB4/CAMK4/ATP2B2/TRDN/ATP2B1/STIM1/ADCY9/SLC8A1/PRKACB/HTR7/FGFR2/CACNA1A/CAMK2A/TACR3/GNAL/PDGFD	46	CHRM2	CHRM2	25	down	CHRM2	protein_coding	AL356489.2	lincRNA	down	0.882816	1	0.882816
hsa04024	cAMP signaling pathway	38/448	216/8081	1.32379e-10	1.86655e-08	1.37256e-08	3.17334	ADRB2/ATP2B4/HTR4/ADRB1/GRIN3A/ADCY5/ADORA2A/ACOX1/CHRM2/HCN4/TIAM1/ATP1A2/RAP1A/CACNA1C/PDE4D/GRIN2A/GRIA4/CNGA3/PLD1/ADCY2/GRIA2/VIP/CAMK4/ATP2B2/ATP2B1/ADCY9/SLC9A1/ADCYAP1/GRIA1/PRKACB/GLI3/SST/CAMK2A/ATP1B2/SSTR1/GRIA3/PDE3A/MAPK10	38	CHRM2	CHRM2	25	down	CHRM2	protein_coding	MBNL1-AS1	lincRNA	down	0.922349	1	0.922349
hsa04024	cAMP signaling pathway	38/448	216/8081	1.32379e-10	1.86655e-08	1.37256e-08	3.17334	ADRB2/ATP2B4/HTR4/ADRB1/GRIN3A/ADCY5/ADORA2A/ACOX1/CHRM2/HCN4/TIAM1/ATP1A2/RAP1A/CACNA1C/PDE4D/GRIN2A/GRIA4/CNGA3/PLD1/ADCY2/GRIA2/VIP/CAMK4/ATP2B2/ATP2B1/ADCY9/SLC9A1/ADCYAP1/GRIA1/PRKACB/GLI3/SST/CAMK2A/ATP1B2/SSTR1/GRIA3/PDE3A/MAPK10	38	CHRM2	CHRM2	25	down	CHRM2	protein_coding	AL356489.2	lincRNA	down	0.882816	1	0.882816
hsa04151	PI3K-Akt signaling pathway	46/448	354/8081	4.01817e-08	1.66154e-06	1.22181e-06	2.34391	PRKAA2/COL4A6/CDKN1A/ITGB3/GHR/IGF1/NGF/SGK1/FGFR1/FGF9/FGF2/BCL2/RELN/FLT3/SOS2/FGF7/CHRM2/BCL2L11/PPP2R3A/PHLPP2/PDGFRA/IL6R/PIK3CG/MAGI2/GNG11/PCK1/IL2/KITLG/CSF1R/EFNA5/GNG12/ERBB4/KIT/TNXB/RXRA/LPAR1/FGFR2/CSF1/NGFR/COL4A5/GNG2/CHAD/TEK/FLT3LG/GNG7/PDGFD	46	CHRM2	CHRM2	25	down	CHRM2	protein_coding	MBNL1-AS1	lincRNA	down	0.922349	1	0.922349
hsa04151	PI3K-Akt signaling pathway	46/448	354/8081	4.01817e-08	1.66154e-06	1.22181e-06	2.34391	PRKAA2/COL4A6/CDKN1A/ITGB3/GHR/IGF1/NGF/SGK1/FGFR1/FGF9/FGF2/BCL2/RELN/FLT3/SOS2/FGF7/CHRM2/BCL2L11/PPP2R3A/PHLPP2/PDGFRA/IL6R/PIK3CG/MAGI2/GNG11/PCK1/IL2/KITLG/CSF1R/EFNA5/GNG12/ERBB4/KIT/TNXB/RXRA/LPAR1/FGFR2/CSF1/NGFR/COL4A5/GNG2/CHAD/TEK/FLT3LG/GNG7/PDGFD	46	CHRM2	CHRM2	25	down	CHRM2	protein_coding	AL356489.2	lincRNA	down	0.882816	1	0.882816
